# Supplementary material for: Gene flow and demographic history of leopards (Panthera pardus) in the central Indian highlands
Source: PubMed Central journal article supplement (PMC3779095; doi:10.1111/eva.12078), 2013-06-06
Supplement: eva0006-0949-SD1.pdf [file eva0006-0949-SD1.pdf]

Table ST1: Details of microsatellite markers used in the study.

| Locus  | Reference                  | Species isolated | Chromosome no | Forward                | Reverse                |
|--------|----------------------------|------------------|---------------|------------------------|------------------------|
| E7     | Bhagavatula & Singh 2006   | Tigers           | - NA -        | GCCCCAAAGCCCTAAAATAA   | GCATGTCGGACAGTAAAGCA   |
| FCA008 | Menotti-Raymond et al 1999 | Domestic cat     | A1            | ACTGTAAATTTCTGAGCTGGCC | TGACAGACTGTTCTGGGTATGG |
| FCA126 | Menotti-Raymond et al 2000 | Domestic cat     | B1            | GCCCCTGATACCCTGAATG    | CTATCCTTGCTGGCTGAAGG   |
| FCA279 | Menotti-Raymond et al 2001 | Domestic cat     | C1            | AGCCAAGTAATATTCCTCTGTG | GTCCATCCGCAGATGAATG    |
| FCA304 | Menotti-Raymond et al 2002 | Domestic cat     | A2            | TCATTGGCTACCACAAAGTAGG | CTGCATGCCATTGGGTAAC    |
| FCA672 | Menotti-Raymond et al 2003 | Domestic cat     | F2            | AAGTTGCTTGACACACTGC    | TCCAAGAGCCTTTTCAGTTAGG |
| F42    | Menotti-Raymond et al 2004 | Domestic cat     | A1            | CCCACGTGGCTAATCAAAT    | CACTGCACAAATTAAGAGGC   |

References:

Bhagavatula J, Singh L (2006) Genotyping faecal samples of Bengal tiger *Panthera tigris tigris* for population estimation: a pilot study. BMC Genet 7:48

Menotti-Raymond M, David VA, Lyons LA et al (1999) A genetic linkage map of microsatellites in the domestic cat (*Felis catus*). Genomics 57:9–23

Table ST2: Effective no. of migrants. Contemporary measures of Nem are above the diagonal (calculated in GENEPOP), and historic measures of Nem are below the diagonal (calculated from MIGRATE).

| Effective no. migrants | Satpura | Melghat | Pench | Kanha |
|------------------------|---------|---------|-------|-------|
| Satpura                | --      | 2.6     | 5.3   | 3.1   |
| Melghat                | 5.5     | --      | 3.3   | 4.7   |
| Pench                  | 8.7     | 5.0     | --    | 2.8   |
| Kanha                  | 7.9     | 4.2     | 5.3   | --    |
